1 **Tricarboxylic acid cycle and proton gradient in *Pandoravirus massiliensis*: Is it still a**  
2 **virus?**

3

4 **Sarah AHERFI<sup>1\*</sup>, Djamal BRAHIM BELHAOUARI<sup>1\*</sup>, Lucile PINAULT<sup>1</sup>, Jean-Pierre**  
5 **BAUDOIN<sup>1</sup>, Philippe DECLOQUEMENT<sup>1</sup>, Jonatas ABRAHAO<sup>2</sup>, Philippe COLSON<sup>1</sup>,**  
6 **Anthony LEVASSEUR<sup>1</sup>, David C. LAMB<sup>3</sup>, Eric CHABRIERE<sup>1</sup>, Didier RAOULT<sup>1</sup>,**  
7 **Bernard LA SCOLA<sup>1†</sup>**

8 **\*Contributed equally to the work**

9 **Affiliations:**

10 <sup>1</sup>Aix-Marseille Université, Institut de Recherche pour le Développement (IRD), Assistance  
11 Publique - Hôpitaux de Marseille (AP-HM); Microbes, Evolution, Phylogeny and Infection  
12 (MEPI); Institut Hospitalo-Universitaire (IHU) - Méditerranée Infection, 19-21 boulevard  
13 Jean Moulin, 13005 Marseille, France

14 <sup>2</sup> Laboratório de Vírus, Departamento de Microbiologia, Instituto de Ciências Biológicas,  
15 Universidade Federal de Minas Gerais, Belo Horizonte, Brazil

16 <sup>3</sup> Institute of Life Science and School of Medicine, Swansea University, Swansea SA2 8PP,  
17 United Kingdom

18

19 <sup>†</sup> **Corresponding author:** Bernard La Scola, IHU - Méditerranée Infection, AP-HM, 19-21  
20 boulevard Jean Moulin, 13005 Marseille, France. Tel.: +33 413 732 401, Fax: +33 413 732  
21 052; email: [bernard.la-scola@univ-amu.fr](mailto:bernard.la-scola@univ-amu.fr)

22

23

24 **Key words:** giant viruses; Pandoravirus; energy metabolism; ATP production; Lipman

25 system; tricarboxylic acid cycle

26

## 27 **ABSTRACT**

28           Since the discovery of *Acanthamoeba polyphaga* Mimivirus, the first giant virus of  
29 amoeba, the historical hallmarks defining a virus have been challenged. Giant virion sizes can  
30 reach up to 2.3  $\mu\text{m}$ , making them visible by optical microscopy. They have large genomes of  
31 up to 2.5 Mb that encode proteins involved in the translation apparatus. Herein, we  
32 investigated possible energy production in *Pandoravirus massiliensis*, the largest of our giant  
33 virus collection. MitoTracker and TMRM mitochondrial membrane markers allowed for the  
34 detection of a membrane potential in virions that could be abolished by the use of the  
35 depolarizing agent CCCP. An attempt to identify enzymes involved in energy metabolism  
36 revealed that 8 predicted proteins of *P. massiliensis* exhibited low sequence identities with  
37 defined proteins involved in the universal tricarboxylic acid cycle (acetyl Co-A synthase;  
38 citrate synthase; aconitase; isocitrate dehydrogenase;  $\alpha$ -ketoglutarate decarboxylase; succinate  
39 dehydrogenase; fumarase). All 8 viral predicted ORFs were transcribed together during viral  
40 replication, mainly at the end of the replication cycle. Two of these proteins were detected in  
41 mature viral particles by proteomics. The product of the ORF132, a predicted protein of *P.*  
42 *massiliensis*, cloned and expressed in *Escherichia coli*, provided a functional isocitrate  
43 dehydrogenase, a key enzyme of the tricarboxylic acid cycle, which converts isocitrate to  $\alpha$ -  
44 ketoglutarate. We observed that membrane potential was enhanced by low concentrations of  
45 Acetyl-CoA, a regulator of the tricarboxylic acid cycle. Our findings show for the first time  
46 that energy production can occur in viruses, namely, pandoraviruses, and the involved  
47 enzymes are related to tricarboxylic acid cycle enzymes. The presence of a proton gradient in  
48 *P. massiliensis* coupled with the observation of genes of the tricarboxylic acid cycle make this  
49 virus a form a life for which it is legitimate to question ‘what is a virus?’.

50

## 51 **Introduction**

52 Since the discovery of *Acanthamoeba polyphaga* Mimivirus (APMV)(1), giant viruses of  
53 amoeba have challenged the historical definition and classification of viruses (2). With a  
54 virion size larger than 200 nm (1) encompassing genome sizes larger than 250 kb (3), giant  
55 viruses differ from all previously described viruses to date. In 2013, *Pandoravirus salinus*, the  
56 first Pandoravirus, broke all the viral size records with a genome size of 2.5 Mbp and 1- $\mu$ m-  
57 diameter viral particles (4). Moreover, Pandoravirus genomes do not harbor any gene(s)  
58 encoding capsid protein(s), another hallmark of viral biology, and as observed by  
59 transmission electron microscopy (TEM), they utilize host cellulose production to build  
60 tegument (4, 5). Among later scientific discoveries causing giant viruses to challenge the virus  
61 definition were the findings of associated virophages, which depicted for the first time a virus  
62 being infected by another virus (6). Ten years later in 2016, the MIMIVIRE system was  
63 identified as a mechanism of defense in Mimiviruses against these invading virophages (7).  
64 This was the first time that a mechanism for destroying alien DNA, analogous to CRISPR in  
65 bacteria, was observed to function in a virus. In 2018, the identification of Mimivirus proteins  
66 involved in protein translation again challenged another key feature of the definition of  
67 viruses (8). Subsequently, an almost complete protein translation apparatus was discovered in  
68 *Tupanvirus* and *Klosneuviruses* (9, 10). More recently, it was found that genes encoding  
69 multiple and unique cytochromes P450 monooxygenases commonly occur in giant viruses in  
70 the *Mimiviridae*, *Pandoraviridae*, and other families in the proposed order Megavirales (11,  
71 12).

72 Moreover, tupanviruses also harbor a gene coding for citrate synthase (13). Recent  
73 data indicate that some giant viruses could have genes that are involved in metabolic  
74 pathways such as fermentation, sphingolipid biosynthesis and nitrogen metabolism (14).  
75 These genes are believed to be used by these viruses to manipulate host metabolic

76 pathways but no evidence suggests that they do not use these gene products themselves for  
77 their own metabolism. As giant viruses have challenged most of the criteria for the virus  
78 definition, we decided to test another key hallmark of independent life, namely, the ability to  
79 produce energy. To test this idea, we used the giant virus *Pandoravirus massiliensis*, which  
80 we recently isolated (15). This family of viruses stands uniquely apart from other giant viruses  
81 of amoebas because of their huge gene content, with more than 80% of their predicted gene  
82 products being ORFans (no homologs in international protein databases). Hence, this virus  
83 provides a novel viral system for the discovery of genes with currently unknown functions. In  
84 the living world, energy generation is mostly associated with the creation of a proton gradient.  
85 Thus, we searched for energy gradients in *P. massiliensis*. We were able to observe the  
86 presence of a proton gradient in this virus, and surprisingly, it was mainly present in the  
87 mature particles. We then searched for genes that could be associated with this proton  
88 gradient. No genes involved in the respiratory chain or with identity to ATP synthase were  
89 detected. However, genes having homologies with nearly all enzymes of the tricarboxylic acid  
90 (TCA) cycle were observed. These genes were transcribed together, and the product of at least  
91 one gene, isocitrate dehydrogenase (IDH), was functional. These findings position this virus  
92 as a form a life for which it is legitimate to now ask the question: ‘What is a virus?’

93

## 94 **Materials and methods**

### 95 ***P. massiliensis* immunofluorescence staining using mouse specific polyclonal antibodies**

96 To avoid confusing virus staining virus with staining of the amoeba mitochondria, we first  
97 immunized a mouse with *P. massiliensis* by the subcutaneous route. After three inoculations,  
98 mouse serum containing polyclonal antibodies specific to *P. massiliensis* was collected and  
99 adsorbed on uninfected *A. castellanii* lysate to remove non-specific antibodies targeting

100 amoeba (16). To permeabilize the cell membranes and saturate the non-specific binding sites,  
101 cells were incubated in fetal calf serum with 1% (v/v) Triton X-100 in phosphate-buffered  
102 saline (PBS) for 1 h. Infected amoebas were incubated overnight at 28°C in a humidified  
103 chamber with anti-Pandoravirus antibodies. Subsequently, the samples were washed three  
104 times with 0.1% (v/v) Triton X100 in PBS. Each sample was incubated with fluorescein  
105 isothiocyanate (FITC)-conjugated goat anti-mouse IgG (Immunotech, Marseille, France) for  
106 60 min at 28°C in a humidified chamber and finally washed three times with PBS.

### 107 **Assessment of a membrane electrogradient in *P. massiliensis* virions**

108 Amoeba were infected with *P. massiliensis* at a multiplicity of infection (MOI) of 10 in  
109 IBIDI® petri  $\mu$ -dishes. Each sample was dyed with MitoTracker Deep Red 633 (Invitrogen,  
110 Carlsbad, California, USA), blocked with acetone, and washed three times with PBS. To  
111 target a proton gradient potential difference across the *P. massiliensis* particle membranes,  
112 two reagents were used: MitoTracker Deep Red 633 and tetramethyl rhodamine (TMRM)  
113 reagent (Thermo Fisher Scientific). For each reagent, *P. massiliensis* viral particles freshly  
114 released from 24-h infected amoeba cultures were used. Briefly, lysed amoeba infected by *P.*  
115 *massiliensis* were centrifuged 10 min at  $500 \times g$ , and cellular debris was discarded. The viral  
116 supernatant was centrifuged 20 min at  $6800 \times g$ , and the pellet was resuspended twice in PAS.  
117 The second time, the viral pellet was resuspended in survival buffer. In control experiments,  
118 sample cultures of *Staphylococcus aureus* were used as positive controls, and viral  
119 supernatant from cowpoxvirus cultured on Vero (ATCC CCL-81) African green monkey  
120 kidney cells (17) was used as negative control. The MitoTracker Deep Red 633 (50  $\mu$ g) was  
121 reconstituted in 1.5 mL of Peptone Yeast culture medium (PYG) culture medium to obtain a  
122 solution stock of 33.3  $\mu$ g/mL, which was subsequently tested in survival buffer in IBIDI®  
123 petri  $\mu$ -dishes previously coated with poly-L lysine to retain adherent cells, even at late time  
124 points of infection and after the wash steps. MitoTracker was added to the samples 1 h post-

125 infection, and images recorded 2, 4, and 6 h post-infection. For late time points of the viral  
126 cycle (8 h, 10 h, 12 h, 14 h, 16 h), MitoTracker was added to the samples 7 h post-infection.  
127 The medium was replaced with PYG. Subsequently, 34  $\mu\text{L}$  of MitoTracker Deep Red 633  
128 pre-incubated at  $37^\circ\text{C}$  was added to each petri  $\mu$ -dish and incubated for 45 min at  $37^\circ\text{C}$ . Each  
129 sample was washed to remove the excess fluorescent dye, and 2 ml of survival buffer was  
130 added. For TMRM, a 1-ml volume of viral particles was deposited in a petri  $\mu$ -dish, after  
131 which 1  $\mu\text{l}$  of stock solution of TMRM (100  $\mu\text{M}$ ) was directly added and incubated 30 min at  
132  $30^\circ\text{C}$ .

### 133 **Assessment of the effect of the decoupling agent CCCP on viral particles**

134 The effect of carbonyl cyanide m-chlorophenylhydrazone (CCCP) (Sigma Aldrich C2759;  
135 Saint-Louis, Missouri, USA), an inhibitor of oxidative phosphorylation that acts by  
136 dissipating the electrochemical gradient induced by the proton concentration, was assessed on  
137 *P. massiliensis* virions treated with TMRM. CCCP reagent (100  $\mu\text{M}$ , 200  $\mu\text{M}$ , 300  $\mu\text{M}$ , 400  
138  $\mu\text{M}$ ) was directly added in tubes containing  $\approx 10^7$  viral particles /ml. Negative control were *P.*  
139 *massiliensis* virions without CCCP. Samples were incubated at  $35^\circ\text{C}$  overnight and then  
140 transferred to petri  $\mu$ -dishes. Next, 1  $\mu\text{l}$  of a stock solution of TMRM (100  $\mu\text{M}$ ) was added  
141 and incubated 30 min at  $30^\circ\text{C}$ . Images were acquired by confocal microscopy using a Zeiss  
142 LSM 800 microscope. The infectivity of *P. massiliensis* particles was assessed before and  
143 after incubation with CCCP by calculating the TCID<sub>50</sub> using the method of Reed and  
144 Muench (18). The potential impact of CCCP on viral replication cycle was also assessed by  
145 immunofluorescence and qPCR. *A. castellanii* strain Neff cells were inoculated with viral  
146 particles previously incubated with 400  $\mu\text{M}$  CCCP and washed three times. As at the end of  
147 the cycle, no difference was observed, so we focused on early time points of the viral cycle.  
148 Infected amoeba were collected 45 min (H0) and 3h (H3) post-infection. *P. massiliensis*  
149 particles spotted on slides were labeled with anti-*P. massiliensis* specific antibodies according

150 to the protocol described above. qPCR was carried out using DNA from the collected cells  
151 with a system targeting the DNA polymerase gene of *P. massiliensis* (forward primer: 5'-  
152 ATGGCGCCCGTCTGGAAG; reverse primer: 5'-GGCGCCAAAGTGGTGCGA). qPCR  
153 was performed with a LightCycler® 480 SYBR Green 1 Master reaction mix (Roche  
154 Diagnostics, Mannheim, Germany), following the manufacturer's temperature program with  
155 60°C for the primer hybridization and elongation temperature.

### 156 **Bioinformatics analyses**

157 The *P. massiliensis* genome was analyzed by BLASTp analyses against the GenBank nr  
158 database using an e-value threshold of  $1 \times 10^{-2}$ . The search for enzymes potentially involved in  
159 energy metabolism was performed by delta BLAST analyses against the Conserved Domain  
160 Database (19, 20). For some predicted ORFs having hits with low similarity, PSI Blast,  
161 HHPRED analyses (21) and structure prediction using the PHYRE2 server were performed  
162 (22). Orthologs in other pandoravirus genomes were searched using the ProteinOrtho tool  
163 with a 30% identity percentage threshold and 50% as a coverage percentage threshold (23).  
164 Gene products of all pandoraviruses were also analyzed by BLASTp against the COG  
165 database (24, 25). The viral ORFs harboring a hit against class C of the COG (energy  
166 metabolism) with a bitscore >50 were considered statistically significant.

### 167 **Transcriptome sequencing (RNA-seq) on *P. massiliensis***

168 *P. massiliensis* replicates in *Acanthamoeba castellanii* Neff (ATCC 30010). The  
169 transcriptome of *P. massiliensis* strain BZ81 was assessed as previously described using  
170 amoebas infected by *P. massiliensis* as well as freshly released mature viral particles (15).  
171 Mature virions were collected 11 h following amoeba inoculation, passed through 5-µm-pore  
172 filters, and centrifuged at  $500 \times g$  for 10 min to remove all amoeba debris.

### 173 **qRT-PCR of suspected *P. massiliensis* TCA cycle genes**



174 Viral DNA isolated from 200 µL of viral supernatant from *P. massiliensis* culture was  
175 extracted using the EZ1 tissue kit (Qiagen, France) according to the manufacturer's  
176 recommendations. RNA was extracted using the RNeasy mini kit (Qiagen, France) at  
177 different time points of the *P. massiliensis* replication cycle, from H0 (i.e., 45 min after  
178 infection of amoeba cells by viral particles) until H16 post-infection (release of neo-synthesized  
179 virions), according to the manufacturer's recommendations.).

180 Total RNA was reverse-transcribed into cDNA using the SuperScript VILO Synthesis Kit  
181 (Invitrogen, France). Nucleotide primers targeting the 7 selected ORFs of the *P. massiliensis*  
182 gene sequences were designed using the primer3 tool (26) (Table 1). qPCR was carried out  
183 using LightCycler® 480 SYBR Green 1 Master reaction mix (Roche Diagnostics, Mannheim,  
184 Germany) following the manufacturer's temperature program with 62°C as the primer  
185 hybridization and elongation temperature. Each experiment was performed in triplicate. The  
186 results were considered positive if the cycle threshold obtained in three replicates was less  
187 than 35.

### 188 **Proteome analysis of *P. massiliensis***

189 Protein extraction was carried out on purified viral particles and amoebas infected with *P.*  
190 *massiliensis* at different time points of the replication cycle (H0 to H16). Briefly, samples  
191 were rapidly lysed in dithiothreitol (DTT) solubilization buffer (2% (w/v) SDS, 40 mM Tris–  
192 HCl, pH 8.0, 60 mM DTT) with brief sonication. The 2D Clean-Up kit was used to eliminate  
193 nucleic acids, salts, lipids, and other molecules that were not compatible with  
194 immunoelectrophoresis. Next, 1D gel electrophoresis analysis was performed with Ettan  
195 IPGphor II control software (GE Healthcare). For 2D gel electrophoresis, buffer (50 mM Tris–  
196 HCl, pH 8.8, 6 M urea), 30% (v/v) glycerol, 65 mM DTT reducing solution, alkylating  
197 solution of iodoacetamide at 100 mM, and an SDS-PAGE gel with 12% (v/v) acrylamide  
198 were used. Protein migration was performed under a constant electric field of 25 mA for 15

199 min, followed by 30 mA for  $\approx$ 5 h. Silver nitrate was used for protein staining. Proteins of  
200 interest were excised from the gel and analyzed.

201 For global proteomic analysis, the protein-containing solution was subjected to dialysis and  
202 trypsin digestion. Dialysis was carried out twice using Slide-ALyzer 2K MWCO dialysis  
203 cassettes (Pierce Biotechnology, Rockford, IL, United States) against a solution of 1 M urea  
204 and 50 mM ammonium bicarbonate pH 7.4: 4 h and overnight. Protein digestion was carried  
205 out by adding 2  $\mu$ g of trypsin solution (Promega, Charbonnières, France) to the alkylated  
206 proteins, followed by incubation at 37°C overnight. Digested protein samples were desalted  
207 using detergent columns (Thermo Fisher Scientific, Illkirch, France) and analyzed by mass  
208 spectrometry on a Synapt G2Si Q-TOF traveling wave mobility spectrometer (Waters,  
209 Guyancourt, France) as described previously (27). An internal protein sequence database built  
210 primarily with two types of amino acid sequences was used as follows: (i) sequences obtained  
211 by translating *P. massiliensis* ORF (ii) sequences obtained by translating the whole genome  
212 into the six reading frames and then fragmenting the six translation products into 250-amino-  
213 acid-long sequences with a sliding step of 30 amino acids. Contiguous sequences that were  
214 positive for peptide detection were fused and reanalyzed.

### 215 **Cloning, expression and purification of predicted *P. massiliensis* TCA cycle enzymes**

216 *P. massiliensis* genes encoding the predicted TCA enzymes (ORFs 132, 181, 206, 577, 595,  
217 762, 864, 1245) were designed to include a Strep-tag at the N-terminus and optimized for  
218 *Escherichia coli* expression. Genes were synthesized by GenScript (Piscataway, NJ, USA)  
219 and ligated between the NdeI and NotI sites of a pET22b(+) plasmid. Competent BL21(DE3)  
220 cells grown in autoinducing ZYP-5052 medium were used for expression of the recombinant  
221 proteins. To produce each protein, the culture was shaken at 37°C until an O.D.600 nm of 0.6  
222 was reached, after which the temperature was lowered to 20°C for 20 h. Cells were harvested  
223 by centrifugation (5 000  $\times$  g, 30 min, 4°C), and the resulting pellet was resuspended in 50 mM

224 Tris pH 8, 300 mM NaCl and stored at -80°C overnight. The crude extract was thawed and  
225 incubated on ice for 1 h following the addition of lysozyme, DNase I and  
226 phenylmethylsulfonyl fluoride (PMSF) to final concentrations respectively of 0.25 mg/mL, 10  
227 µg/mL and 0.1 mM. Partially lysed cells were sonicated using a Q700 sonicator system  
228 (QSonica), and cell debris was removed following a centrifugation step (12 000 g, 20 min,  
229 4°C). Proteins of interest were purified with an ÄKTA avant system (GE Healthcare) using  
230 strep-tag affinity chromatography (Wash buffer: 50 mM Tris pH 8, 300 mM NaCl and Elution  
231 buffer: 50 mM Tris pH 8, 300 mM NaCl, 2.5 mM desthiobiotin) on a 5-mL StrepTrap HP  
232 column (GE Healthcare). Recombinant protein expression was confirmed by MALDI-TOF  
233 MS analysis of excised gel bands previously isolated by SDS-PAGE. Protein concentrations  
234 were measured using a Nanodrop 2000c spectrophotometer (Thermo Scientific).

### 235 **IDH activity assay and kinetics**

236 IDH activity assays were performed using the Isocitrate Dehydrogenase Activity Assay kit  
237 (MAK062) from Sigma-Aldrich (St. Louis, MS, USA) and monitored with a Synergy HT  
238 microplate reader (BioTek, Winooski, VT, USA). Reactions were carried out in duplicate at  
239 37°C in a 96-well plate containing a final volume of 100 µL in each well. Conversion of the  
240 isocitrate substrate to  $\alpha$ -ketoglutarate was monitored for 30 min following absorbance  
241 variations at 450 nm, corresponding to the production of NADH. A NADH standard curve  
242 was plotted and allowed quantification of the produced NADH with our enzyme and  
243 calculation of its specific activity. Initial velocities were calculated using Gen5.1 software  
244 (BioTek), and the obtained mean values were fitted using the Michaelis-Menten equation in  
245 Prism 6 (GraphPad Software, San Diego, CA, USA).

### 246 **Assessment of the effect of acetyl CoA on *P. massiliensis* viral particles**

247 Acetyl-CoA (Sigma-Aldrich) was added at concentrations of 0.8 mM, 0.4 mM, 0.2 mM, 0.1  
248 mM, 0.01 mM, and 0.001 mM to 1 mL of the viral suspension of purified particles ( $\approx 10^8$   
249 particles/ml). The negative control consisted of viral particles without acetyl CoA. The  
250 samples were incubated at 30°C for 24 h. After incubation, the samples were transferred into  
251 petri  $\mu$ -dishes and stained with TMRM by following the above-described protocol. Images  
252 were acquired using an LSM 800 confocal microscope. Image processing and fluorescence  
253 intensity evaluations were conducted using Zen Bleu software.

## 254 **Statistical analysis**

255 Statistical analysis was performed using GraphPad Prism for Windows. Statistical differences  
256 were evaluated by one-way ANOVA. Statistical significance was set at  $p < 0.05$ .

257

## 258 **Results**

### 259 **Detection of membrane potential in *P. massiliensis* virions**

260 Membrane potential in *P. massiliensis* virions was assessed during the replication cycle in *A.*  
261 *castellanii* and mature virions freshly released from amoebas. During the viral cycle of *P.*  
262 *massiliensis* in *A. castellanii*, a variable proportion of MitoTracker-labeled viruses was  
263 observed (Figure1). The specificity of the labeling was ensured by the co-localization of  
264 FITC-conjugated anti- *P. massiliensis* antibodies.

265 An analogous experiment performed using mature viral particles showed that approximately  
266 20% of the total number of particles was labeled both by anti-*P. massiliensis* specific  
267 antibodies and MitoTracker Deep Red633 (Figure 2). Moreover, the viral particles were also  
268 marked by TMRM staining (under the TRITC wavelength (532 nm), with a fluorescent signal  
269 (Figures 3,4)), similar to the results obtained for the *S. aureus* positive control. No  
270 fluorescence was observed in the cowpoxvirus negative control experiments.

### 271 **Viral particles treated with CCCP**

272 *P. massiliensis* particles were incubated with a range of concentrations of CCCP: 100  $\mu$ M,  
273 200  $\mu$ M, 300  $\mu$ M, and 400  $\mu$ M. For the *S. aureus* positive control, the fluorescent signal  
274 generated by TMRM decreased significantly ( $p < 0.05$ ) in the presence of all concentrations of  
275 CCCP compared with the negative controls (viral particles without CCCP) (Figure 5).

276 The titer of these viral particles after incubation with CCCP did not show any significant  
277 difference compared with the negative control ( $10^{7.2}$  TCID<sub>50</sub>/ml). Delta-Ct between the  
278 negative control (CCCP untreated samples) and viral particles preincubated with CCCP at 400  
279  $\mu$ M was 1.85 and 2.57 for the H0 and H3 post-infection time points, respectively.  
280 Immunofluorescence revealed a smaller number of labeled viral particles preincubated with  
281 CCCP at 400  $\mu$ M on amoeba cells (1313 and 1613 at H0 and H3, respectively) than the  
282 negative control (1658 and 1889 at H0 and H3, respectively), but the difference was not  
283 significant (Figure 6).

#### 284 **Evaluation of the fluorescence intensity of TMRM after incubation of *P. massiliensis*** 285 **particles with acetyl Co-A**

286 In comparison to the negative control (untreated pandoravirus particles) (Figure 8.A1), the  
287 TMRM fluorescent signal significantly increased in the presence of low concentrations of  
288 acetyl-CoA (0.01 mM) (figure 8.F1.I) ( $p < 0.05$ ) and significantly decreased in the presence of  
289 high concentrations of acetyl CoA (0.8 mM, 0.4 mM) (Figure 7.B1.C1.I) ( $p < 0.05$ ).

290 In positive control experiments using *S. aureus*, the TMRM fluorescent signal increased  
291 significantly at low concentrations of acetyl-CoA (0.1 mM) (Figure 7.E2.II) ( $p < 0.05$ ) and  
292 decreased significantly in the presence of high concentrations of acetyl CoA (0.8 mM, 0.4  
293 mM) (Figure 7.B2.C2.II, Figure 8.B2.C2.II) ( $p < 0.05$ ).

#### 294 **Bioinformatics analyses**

295 Using DELTA-BLAST analyses against the Conserved Domain Database (CDD) (20), low

296 sequence similarity with enzymes involved in the TCA were found. Before concluding that  
297 this similarity was not significant, we searched for other predicted *P. massiliensis* gene  
298 products with similarities to other enzymes of the TCA cycle (i.e., citrate synthase, aconitase,  
299  $\alpha$ -ketoglutarate dehydrogenase, succinyl CoA synthetase, succinate dehydrogenase,  
300 fumarase). Low similarities were found for 6 *P. massiliensis* predicted gene products with 6  
301 enzymes of the TCA cycle. The product of ORF577 exhibited 33% identity to the conserved  
302 domain PRK05614 of citrate synthase (bitscore 58). A similarity of the ORF1245 gene  
303 product was found for domain pfam05681 of aconitase. The *P. massiliensis* ORF132 gene  
304 product harbored similarity to isocitrate/isopropyl malate dehydrogenase (COG0473) with a  
305 bitscore of 67 and 30% identity. Using a HHPRED with the TIGR PFAM database also  
306 revealed a low similarity of ORF132 with TIGR00169, an NAD or NADP dehydrogenase,  
307 including dimeric forms of IDH. In addition to the similarity found for ORF132, ORF864  
308 harbored 50% identity to another domain of IDH (pfam03971) (bitscore: 54). No similarity  
309 was found for  $\alpha$ -ketoglutarate deshydrogenase or succinate thiokinase. However, a low  
310 similarity was found for the *P. massiliensis* predicted ORF762 gene product (bitscore: 55;  
311 identity: 41%) with alpha-ketoglutarate decarboxylase, which converts alpha-ketoglutarate to  
312 succinate, switching the 2 steps of alpha-ketoglutarate dehydrogenase and succinate  
313 thiokinase. The ORF181 gene product was approximately 30% identical to domain  
314 PRK09078 of the succinate dehydrogenase (bitscore: 77). Finally, domain PRK06246 of  
315 fumarase showed 30% identity to the predicted ORF206 gene product (bitscore: 58). The  
316 search for a similarity of structure of these 7 ORFs with Phyre2 was inconclusive. No  
317 similarity was found for malate dehydrogenase. Of note, a hit with acetyl-CoA synthetase, the  
318 immediate step upstream of the first step of the TCA cycle (synthesis of citrate starting from  
319 acetyl-CoA) was found for the ORF595 gene product (bitscore: 58; identity: 24%).  
320 BLASTp analyses of these 8 *P. massiliensis* ORFs putatively involved in the TCA cycle

321 against the nr database revealed the predicted enzymatic function for only the gene product of  
322 ORF595, with only one hit annotated as acetyl CoA synthetase of *Phalacrocorax carbo*, with  
323 33% identity. An ortholog in other pandoraviruses was also found for the ORF132, ORF181  
324 and ORF206 of *P. massiliensis*. ORF132 was orthologous to YP00948512.1 from *P.*  
325 *neocaledonia*. Orthologs for ORF181 were found in all the other pandoraviruses: cds786 from  
326 *P. macleodensis*; cds867 from *P. neocaledonia*; cds120 from *P. salinus*; cds1076 from *P.*  
327 *celtis*; cds1057 from *P. quercus*; pi\_168 from *P. inopinatum* (YP009119137.1); and cds943  
328 from *P. dulcis*, with e-values and identities ranging from 1.52e-52 to 5.29e-56 and 74 to 46%,  
329 respectively. Orthologs for ORF206 were found in *P. neocaledonia* (cds851), *P. macleodensis*  
330 (cds769), *P. dulcis* (cds1004), *P. salinus* (cds1274), and *P. quercus* (cds1120). Stringent  
331 DELTA-BLAST analyses for other pandoraviruses (e-value  $\leq 1e-3$  and identity  $\geq 30\%$  as  
332 thresholds) showed that 12 predicted translated ORFs had a hit against a domain of an enzyme  
333 involved in the TCA cycle, which was confirmed by BLASTp analysis against the nr  
334 database. These 12 ORFs putatively encode an acetyl-coenzyme A synthetase, a citrate  
335 synthase, an aconitase, a NADP-dependent IDH, a succinate dehydrogenase, and a malate  
336 dehydrogenase (Table 2). Moreover, DELTA-BLAST analysis revealed that a single  
337 translated ORF from *P. neocaledonia* (YP\_009482013.1) harbored similarity to NADH  
338 dehydrogenase, an enzyme involved in the respiratory chain. This result was confirmed by  
339 BLASTp analysis against the nr database (bitscore: 45; identity: 31% with PKL55719.1,  
340 NADH:ubiquinone oxidoreductase from Methanomicrobiales archaeon HGW-  
341 Methanomicrobiales-6).

342 BLASTp analysis against the COG database provided a hit for COG0277 (FAD/FMN-  
343 containing dehydrogenase) in all but two (*P. celtis* and *P. macleodensis*) pandoraviruses, with  
344 e-values ranging from 9.5e-68 and 9.1e-62 and identity percentages between 30.6 and 33.5%  
345 for alignment lengths ranging from 514 to 532 amino acids.

346 A hit was also found in *P. salinus*, *P. dulcis*, *P. inopinatum* and *P. pampulha* for COG1254  
347 (acylphosphatase), with e-values ranging from 2.1e-15 to 2.57e-12 and identity percentages  
348 from 23.5 to 28.2% for alignments ranging from 156 to 239 amino acids in length.

#### 349 **Transcriptomics of *P. massiliensis*: RNA-seq and qRT-PCR**

350 RNA sequencing revealed that 6 of the 8 predicted *P. massiliensis* ORFs were transcribed at  
351 different time points of the viral cycle, especially between H4 and H8 post-infection (figure  
352 8). No transcripts were detected for ORF595 (putative acetyl-coenzyme A synthetase) or  
353 ORF181 (putative succinate dehydrogenase). qRT-PCR revealed that 8 ORFs were  
354 transcribed at different time points of the viral cycle. For ORFs 595, 577, 1245, 132, 864, 762  
355 and 206, the lowest Ct values were globally found between H8 and H16 post-infection. Of  
356 note, ORF181, the gene product of which exhibited a low similarity to succinate  
357 dehydrogenase, was transcribed at only one time point: 16 h post-infection (Table 3).

#### 358 **Proteome Analysis of *P. massiliensis***

359 Proteomics analysis allowed us to identify 182 proteins, of which 162 (89%) were found in  
360 mature virions and 20 (11%) during the viral cycle. The function of most of these proteins is  
361 unknown. Two *P. massiliensis* proteins predicted to be involved in an energy production  
362 pathway were identified by this analysis in mature particles: ORF762 (putative  $\alpha$ -  
363 ketoglutarate decarboxylase) and ORF595 (putative acetyl-coenzyme A synthetase) with an  
364 identity percentage of 100%.

#### 365 **Functional tests of enzymatic function**

366 Genes encoding the predicted enzymes of interest were synthesized and transferred to  
367 competent *E. coli* for recombinant protein expression. Soluble proteins were obtained for  
368 ORFs 577 (citrate synthase), 1245 (aconitate hydratase), 132, 864 (IDH), 787 and 1146 ( $\alpha$ -



369 ketoglutarate decarboxylases). We investigated the potential IDH activity of ORFs 132 and  
370 864. We could determine a specific activity of 4 mU/mg for ORF 132, but no activity for ORF  
371 864 (Figure 9). Kinetic assays were also performed to evaluate the catalytic parameters of  
372 ORF132. According to Michaelis-Menten equation fitting ( $R^2=0.993$ ), the following  
373 parameters were estimated:  $k_{cat}=6.8 \times 10^{-4} \text{ s}^{-1}$ ,  $K_m=51.8 \text{ }\mu\text{M}$  and  $k_{cat}/K_m=13.12 \text{ s}^{-1} \cdot \text{M}^{-1}$ . In  
374 parallel, we performed the same analysis of human IDH from Sigma-Aldrich (St. Louis, MS,  
375 USA) and could determine a specific activity of 6.3 U/mg using the previously mentioned kit,  
376 as well as a  $k_{cat}=16.3 \text{ s}^{-1}$ ,  $K_m=585.4 \text{ }\mu\text{M}$  and  $k_{cat}/K_m=2.78 \times 10^4 \text{ s}^{-1} \cdot \text{M}^{-1}$  with an  $R^2$  of  
377 0.997.

378 Other predicted activities were also tested for ORFs 577, 1245, 787 and 1146 using the Citrate  
379 Synthase Assay kit, Aconitase Activity Assay kit and  $\alpha$ -ketoglutarate Dehydrogenase Activity  
380 Colorimetric Assay kit from Sigma-Aldrich (St. Louis, MS, USA). However, no activity  
381 could be observed for these enzymes (data not shown).

382

## 383 **Discussion**

384 In the present study, we identified virion membrane potential for the first time using  
385 two different fluorescent mitochondrial dyes, MitoTracker Deep Red 633 and TMRM, which  
386 allowed the detection of a fluorescent signal in mature virions of *P. massiliensis*. TMRM has  
387 been scientifically acknowledged as the best marker to assess mitochondrial membrane  
388 potential (28). For each experiment, critical negative controls were used to avoid false  
389 positive results. The intensity of this membrane potential was abolished following treatment  
390 with CCCP, a decoupling agent, confirming the accuracy of our observation. These intriguing  
391 findings represent the first experimental observation that a virus can have a membrane  
392 voltage. The search for predicted *P. massiliensis* proteins potentially involved in energy  
393 metabolism was unsuccessful for all enzymes except those in the TCA cycle. Of these

394 enzymes, IDH was observed to be functional. The results showing that the virion membrane  
395 potential could be modified following addition of variable concentrations of acetyl-CoA, a  
396 known regulator of the TCA cycle, confirmed our findings. Indeed, bioinformatics analyses  
397 showed that *P. massiliensis* possessed all the genes encoding for enzymes of the TCA cycle  
398 (also called the Krebs or citric acid cycle). However, bioinformatics analysis revealed low  
399 sequence similarities with *bona fide* TCA orthologs. Furthermore, RNA-seq and confirmation  
400 by RT-PCR demonstrated that the predicted *P. massiliensis* TCA ORFs were all transcribed at  
401 the same time points, especially at the end of the developmental cycle of the virus (Figure 8).  
402 Two products of these genes were identified by proteomic analyses in mature particles, and  
403 the product of at least one predicted ORF, ORF132 encoding IDH, was shown to be  
404 functional. In the TCA cycle, IDH converts the isocitrate in  $\alpha$ -ketoglutarate in the presence of  
405 the NAD<sup>+</sup> or NADP<sup>+</sup> cofactor. In nature, IDH catalyzes a catabolic reaction, during which  
406 NAD<sup>+</sup> abstracts a hydride ion, which is a highly stereospecific enzymatic mechanism. This  
407 functionality cannot simply be the result of chance. The IDH step of the TCA cycle is often an  
408 irreversible reaction, with an overall estimated free energy of -8.4 kJ/mol (29). It is regulated  
409 by substrate availability, product inhibition, and competitive feedback inhibition by ATP (30).  
410 Isocitrate binds within the enzyme active site, which is composed of 8 amino acids. The metal  
411 ion Mg<sup>2+</sup> or Mn<sup>2+</sup> binds to three conserved Arg residues through hydrogen bond networks.  
412 The cofactor NAD<sup>+</sup> or NADP<sup>+</sup> binds within four regions with similar properties among the  
413 IDH enzymes, located around amino acids [250–260], [280–290], [300–330], and [365–380]  
414 (31). ORF132 is 146 amino acids long, while the known IDH from *E.coli* is 417 long  
415 (QJZ24410.1). IDH is typically multimeric (32) suggesting that the pandoraviral form may  
416 also form multimers. If the pandoraviral IDH is an ancestral form of the current eukaryotic  
417 IDH, then it is not surprising that the K<sub>m</sub> and K<sub>cat</sub> of ORF132 are low. Subsequently,

418 enzymes involved in the TCA cycle have evolved towards optimal performance with higher  
419  $K_m$  and  $K_{cat}$  values.

420 The TCA cycle is the central metabolic hub of cells. It is an exergonic catabolic energy  
421 acquisition pathway, which results in the oxidation of an acetyl group (derived from carbon  
422 compounds) to two molecules of carbon dioxide with the concomitant harvesting of high-  
423 energy electrons. Those electrons generate a proton gradient across the inner mitochondrial  
424 membrane through oxidative phosphorylation, with the aim of producing ATP through ATP  
425 synthase (33). The TCA cycle also provides, among other things, oxaloacetate for  
426 gluconeogenesis, intermediates for amino acid biosynthesis, nucleotide bases, cholesterol and  
427 porphyrins (33, 34) . Of note, not all eukaryotes have mitochondria (35, 36) and the TCA  
428 cycle can occur in anaerobic organisms through the use of fumarate, nitrate, or various other  
429 compounds as terminal electron acceptors instead of  $O_2$  (37, 38).

430       As *P. massiliensis* is neither a eubacterium nor a eukaryote, the role of the TCA cycle  
431 and the existence of a membrane potential in mature particles is currently enigmatic. In  
432 eukaryotic mitochondria and bacteria, the membrane potential allows cells to function as a  
433 battery and generate energy. In eukaryotic cells, mitochondrial membrane potential results in  
434 the production of ATP via the TCA cycle. For *P. massiliensis*, we could not detect the  
435 production of ATP in mature particles (unpublished data). We could only observe a lower  
436 number of viral particles on amoeba cells infected with virions preincubated with CCCP at H0  
437 and H3 post-infection than in negative controls, which suggested that the membrane voltage  
438 might be involved in the infection process of amoeba cell particularly in the early stages of  
439 infection. Until now, few viral genes in gene viruses have been described as possibly involved  
440 in metabolic pathways such as fermentation, sphingolipid biosynthesis and nitrogen  
441 metabolism (14). *Ostreococcus tauri* virus encodes an ammonium transporter, which enables  
442 host growth rescue when cultured with ammonium as the sole nitrogen source (39). TetV-1

443 encodes a mannitol metabolism enzyme, a saccharide degradation enzyme as well as other  
444 key fermentation genes (40). In all these previous cases, the viral genes seem to be host-  
445 derived and considered to be involved in viral manipulation of the host metabolism. It has  
446 also been shown that some giant viruses, including pandoraviruses, harbor cytochrome P450  
447 genes, encoding enzymes that are known to be essential in the metabolism of endogenous  
448 regulatory molecules and exogenous drugs, but not their ancillary enzymatic redox partners,  
449 which could be recruited from host (12). Recently, a deep analysis of 501 environmental  
450 metagenome-assembled genomes of NCLDV revealed a diversity of metabolic genes  
451 involved in nutrient uptake, light harvesting, nitrogen metabolism, glycolysis and the TCA  
452 cycle (41). Moreover, tupanviruses possess a gene encoding citrate synthase, the first enzyme  
453 in the TCA cycle, for which no homologs were found in any other known virus. Phylogenetic  
454 analyses showed an independent origin of this gene in tupanviruses, which may have been  
455 acquired by tupanviruses via horizontal gene transfer from sympatric bacteria.

456 The phylogenetic origin of the TCA cycle may be the reverse TCA cycle, an endergonic  
457 anabolic pathway [37] that is used by some bacteria to produce carbon compounds [37-43].  
458 However, the evolutionary history of the TCA cycle has not been completely elucidated,  
459 though it has been suggested that prior to endosymbiotic events, this pathway operated only as  
460 isolated steps [44]. Thus, the origin of its enzymes might be associated with lateral gene  
461 transfer or duplication events, suggesting other possible functionalities than those currently  
462 known [45]. Our data indicate that new candidates must be considered in the search for the  
463 origin of this cycle.

464 Evidence of energy production and the finding that a virus can carry enzymes encoding a  
465 TCA cycle opens a new horizon in giant virus research. Further experiments investigating the  
466 crystal structures of the viral enzymes, especially those of IDH, will be of particular interest  
467 for advances in the comprehension of this mysterious pandoravirus. Moreover, the use of

468 yeast and bacterial complementation experiments to confirm the predicted enzymatic  
469 functions seems to be the logical next steps of this work. The database of newly discovered  
470 giant viruses is constantly growing and constitutes an important resource for the search for  
471 similar predicted enzymatic functions potentially involved in metabolic pathways.

472

## 473 **Conclusions**

474 *P. massiliensis* undermines the last known historical viral hallmark, the lack of the Lipman  
475 system. Thus, the findings presented herein raise questions concerning whether  
476 pandoraviruses can still be classified biologically as a virus and renews arguments regarding  
477 the living nature of viruses in general.

478

## 479 **Funding**

480 This work was supported by the French Government under the “Investments for the Future”  
481 program managed by the National Agency for Research (ANR), Méditerranée-Infection 10-  
482 IAHU-03. It was also supported by Région Provence-Alpes-Côte d’Azur and European  
483 funding FEDER PRIMMI (Fonds Européen de Développement Régional - Plateformes de  
484 Recherche et d’Innovation Mutualisées Méditerranée Infection).

## 485 **Conflict of interest and financial disclosure**

486 No potential conflicts of interest or financial disclosure are reported for any authors.

487

488

489 **FIGURE LEGENDS**

490 **Figure 1. Confocal imaging of amoeba infected by *P. massiliensis* stained with**  
491 **MitoTracker Deep Red (in red) and with specific anti-*P. massiliensis* antibodies (in**  
492 **green). A,B Colocalization of the MitoTracker signal (in red) with virus marked by specific**  
493 **antibodies (FITC) (arrows). C: Merge of Bradford, FITC and MitoTracker fluorescence.**

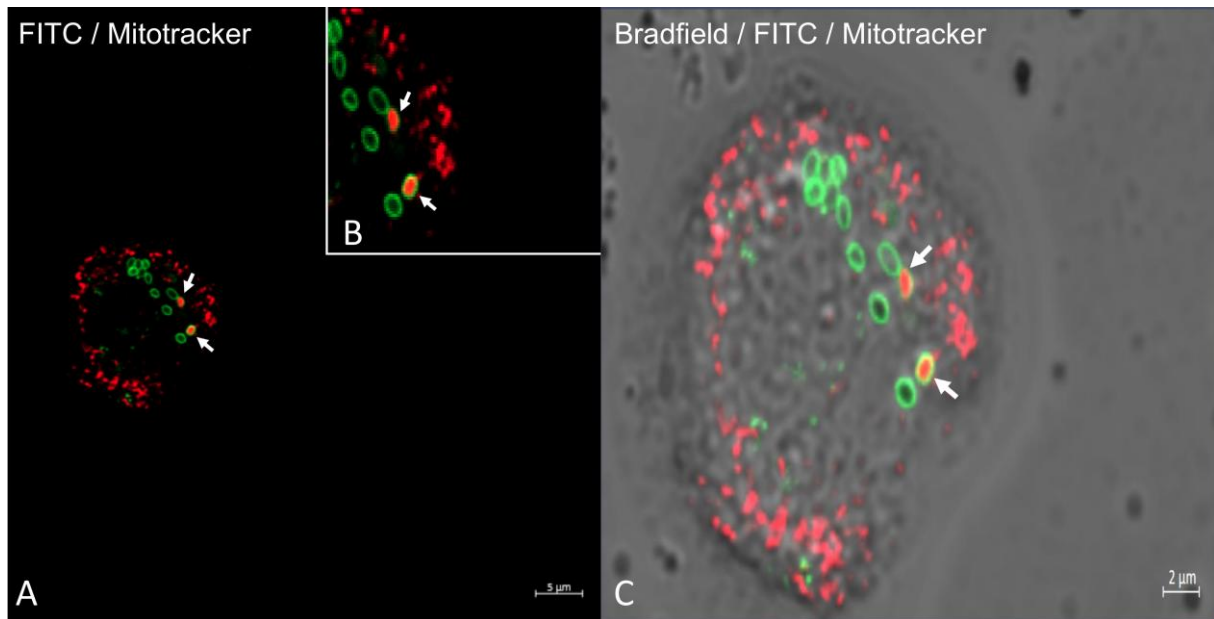

494

495

496 **Figure 2. Confocal imaging of MitoTracker staining of viral mature particles of *P.***  
497 ***massiliensis*.** A: Specific antibody stained viral particles (FITC) (white arrows). B:  
498 MitoTracker Deep Red (red) incorporated into *P. massiliensis* particles (white arrow). C,D:  
499 Colocalization of the MitoTracker signal (red) with *P. massiliensis* virions marked by specific  
500 antibodies (white and blue arrow).

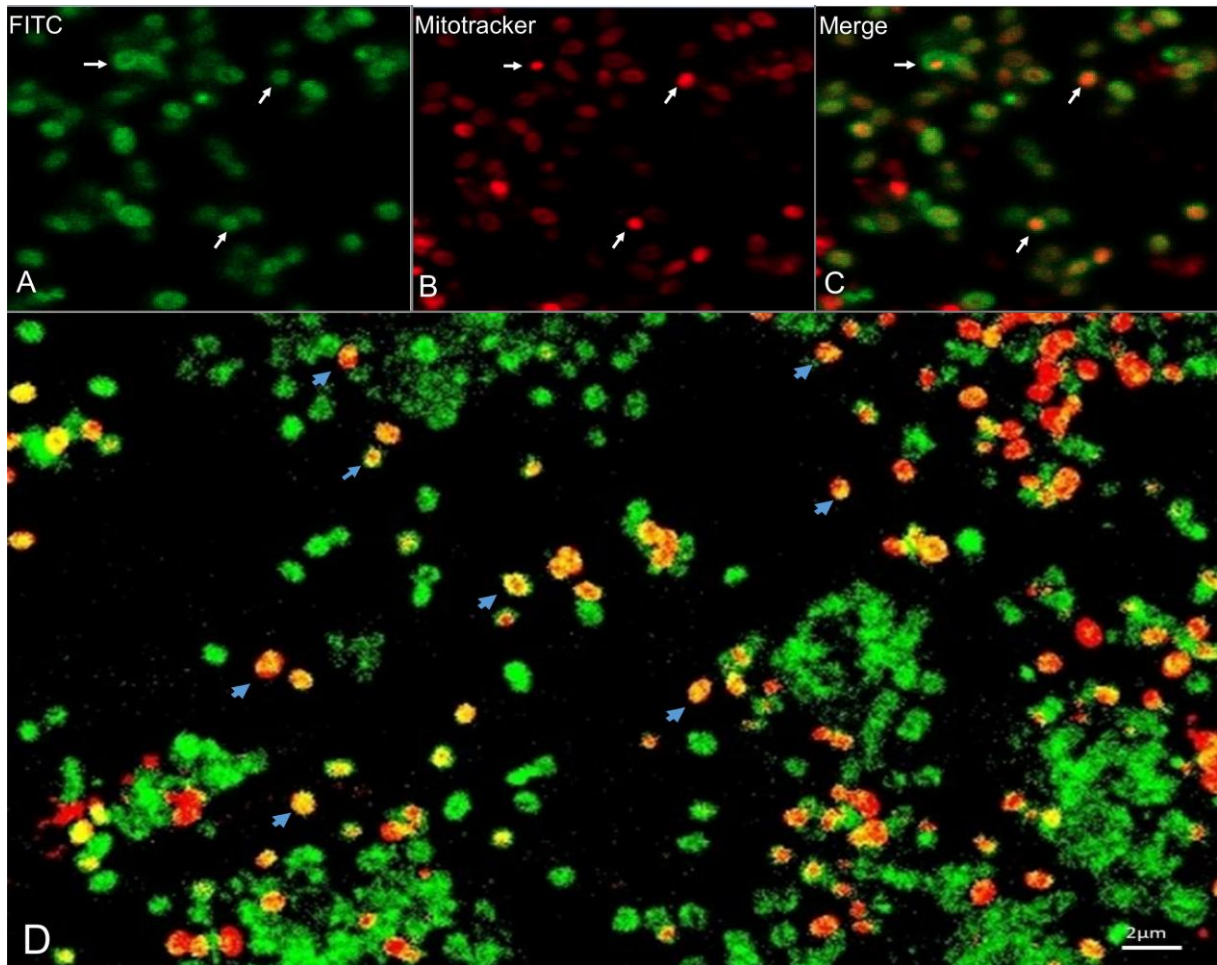

501

502

503 **Figure 3. Confocal imaging of TMRM staining of purified *P. massiliensis* virions.** A,B:  
504 Viral mature particles stained with TMRM (arrows). C: Bradford channel. D: Merge of  
505 Bradford and TMRM showing the internalization of the TMRM signal in viral particles.

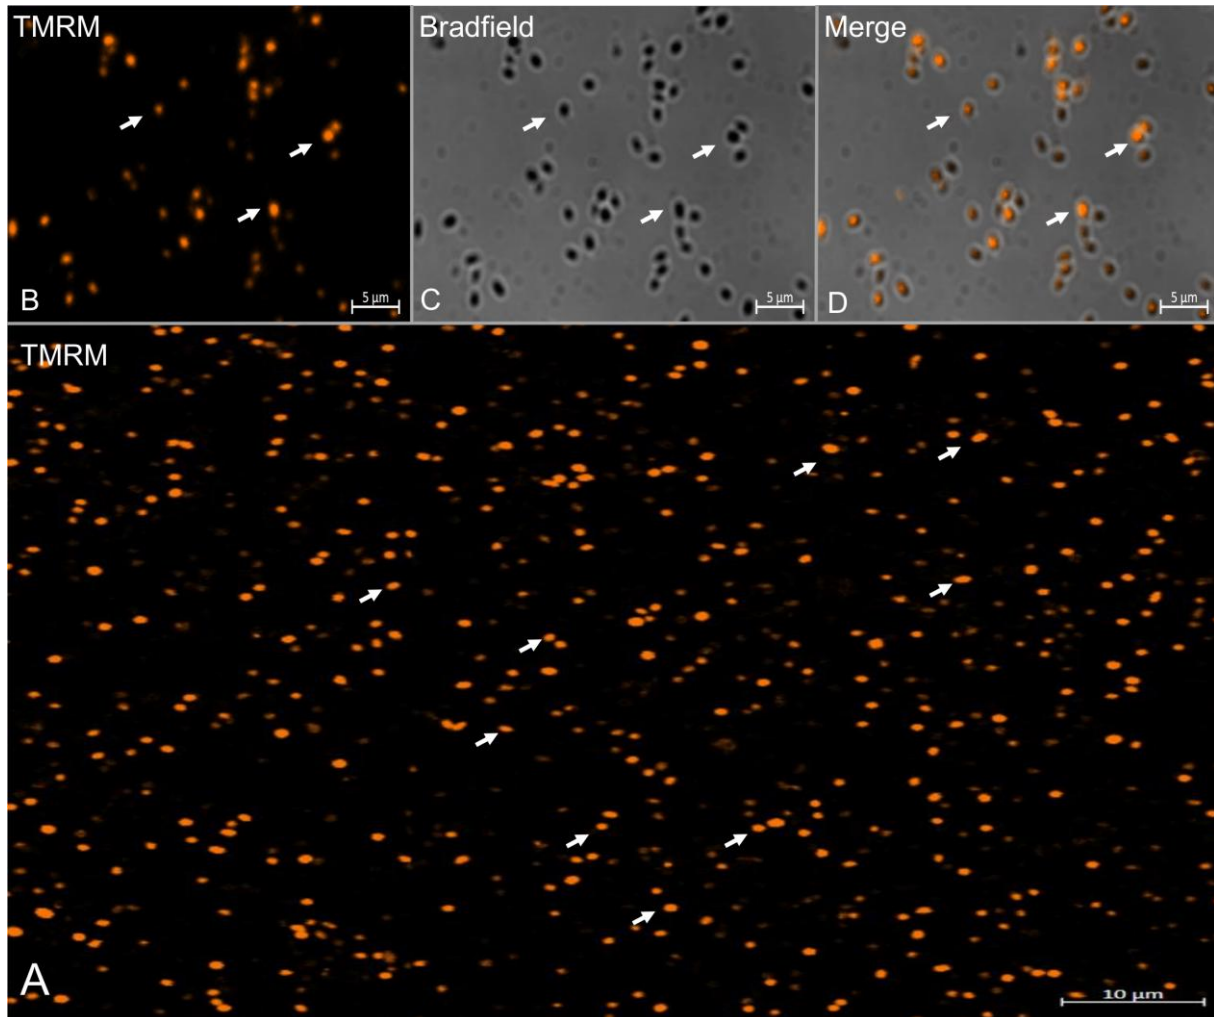

506

507



508 **Figure 4. TMRM fluorescent staining of viral mature particles of *P. massiliensis* (A1-**  
509 **C1). Positive control consisting of *S. aureus* (A2-C2) and negative controls consisting of**  
510 **cowpoxvirus (A3-C3) are shown.**

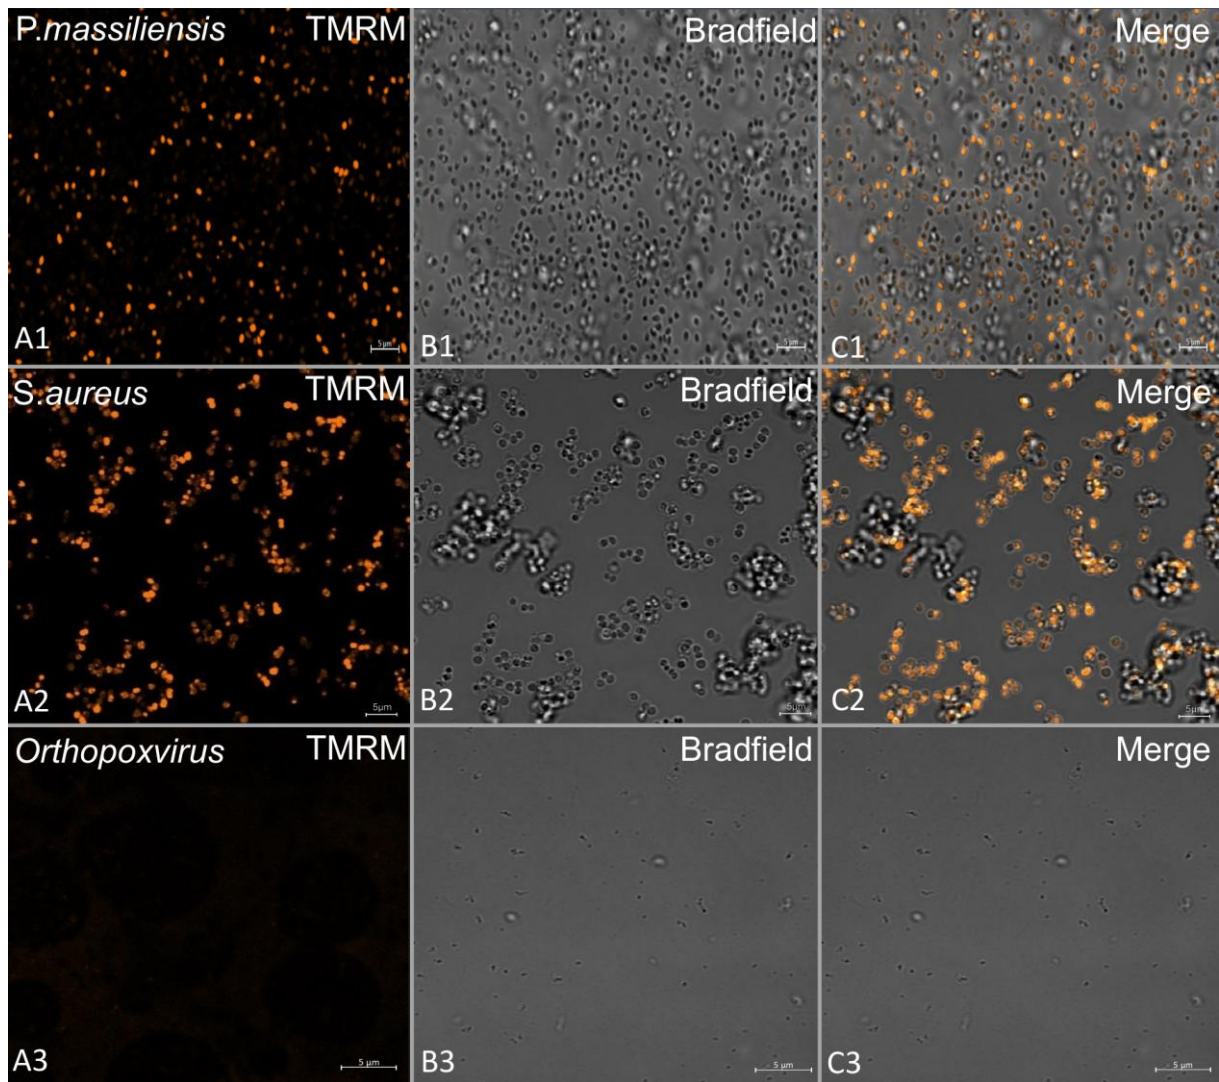

511

512

513 **Figure 5. Evaluation of the fluorescence intensity of TMRM after CCCP treatment.**

514 (A1-E1): Confocal imaging of TMRM staining following CCCP treatment of *P. massiliensis*  
515 particles. A1: Control experiment using untreated *P. massiliensis* particles. B1,E1: Confocal  
516 imaging of *P. massiliensis* virions treated with different concentrations of CCCP. (A2-E2):  
517 Confocal imaging of TMRM staining after CCCP treatment of the positive control (*S.*  
518 *aureus*). A2: Control experiment showing untreated *S. aureus*. B2,E2: *S. aureus* treatment  
519 with a different concentration of CCCP. (I): Estimation of TMRM fluorescence intensity of *P.*  
520 *massiliensis* particles following CCCP treatment. (II): Estimation of TMRM fluorescence  
521 intensity of *S. aureus* following CCCP treatment.

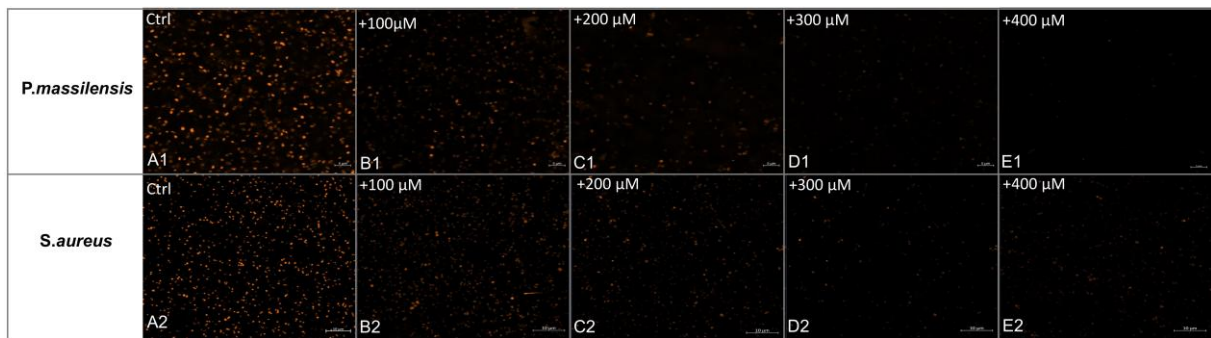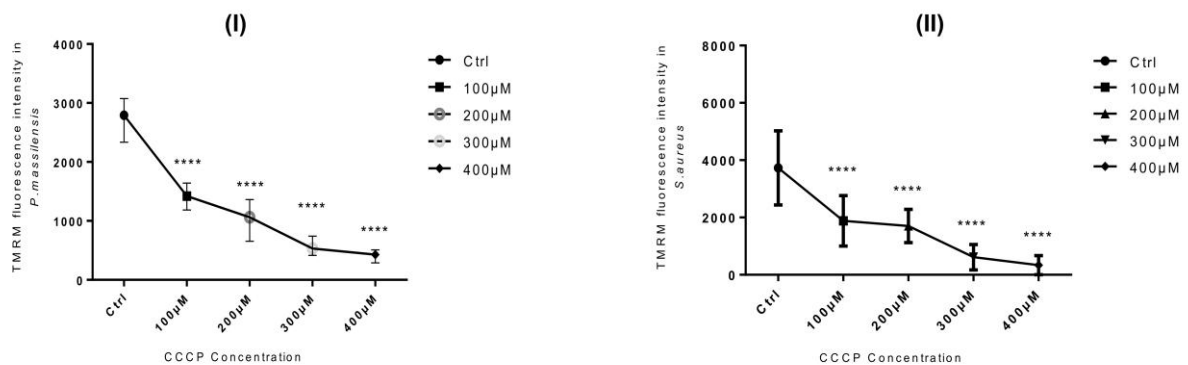

522

523

524 **Figure 6: Assessment of the CCCP treatment effect on *P. massiliensis* infectivity**

525 (A1-B2): Immunofluorescence confocal imaging of stained amoeba infected with *P.*  
526 *massiliensis* particles preincubated with and without CCCP. (A1) Negative control: *P.*  
527 *massiliensis* particles (green) in amoeba at H0 p.i. (B1) *P. massiliensis* + CCCP in amoeba at  
528 H0 p.i. (A2) Negative control: *P. massiliensis* virions in the absence of CCCP (green) in  
529 amoeba at H3 p.i. (B2) *P. massiliensis* particles (green) in amoeba at H3 p.i. (I): Estimation of  
530 the number of stained particles of *P. massiliensis* particles without and with the highest  
531 concentration of CCCP (400  $\mu$ m) per/100 amoebas at H0, H3 p.i. (II): Representation of the  
532 mean threshold cycle (Ct) of the qPCR experiments (triplicate) for isolated *P. massiliensis*  
533 DNA before and after CCCP treatment according to the postinfection time from 0 to 3 h.

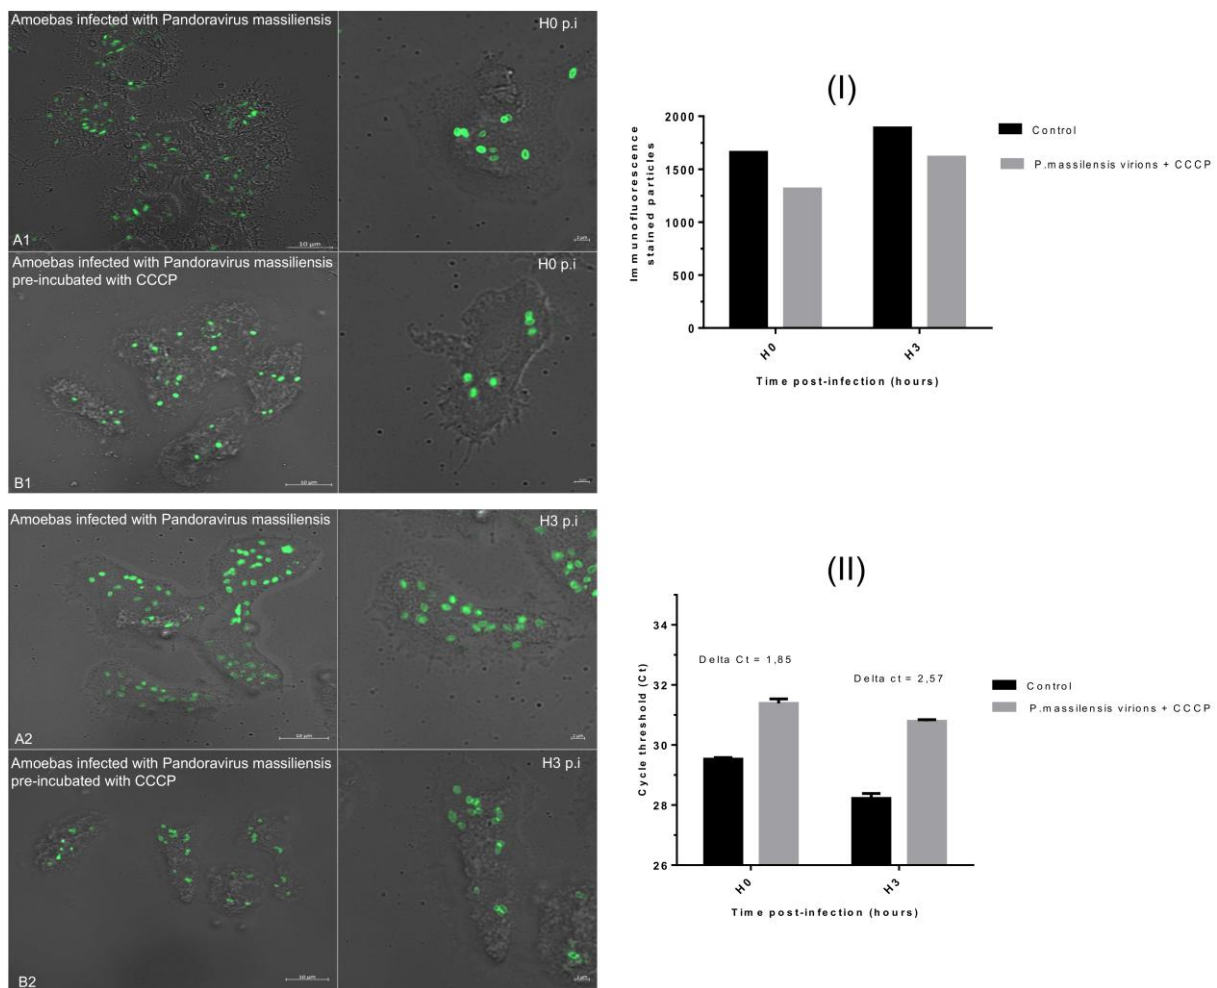

534

535

536 **Figure 7: TMRM fluorescence intensity evaluation following acetyl CoA treatment.**

537 (A1-G1): Confocal imaging of TMRM staining following acetyl CoA treatment of *P.*  
 538 *massiliensis* particles. A1: Control condition with untreated *P. massiliensis* particles. B1,G1:  
 539 *P. massiliensis* virions treated with different concentrations of acetyl CoA. (A2-G2): Confocal  
 540 imaging of TMRM staining after acetyl CoA treatment of the positive control (*S. aureus*). A2:  
 541 Control experiment with untreated *S. aureus*. B2,G2: *S. aureus* treatment with a different  
 542 concentration of acetyl CoA. (I): Estimation of the TMRM fluorescence intensity of *P.*  
 543 *massiliensis* particles after acetyl CoA treatment. (II): Estimation of the TMRM fluorescence  
 544 intensity of *S. aureus* after acetyl CoA treatment.

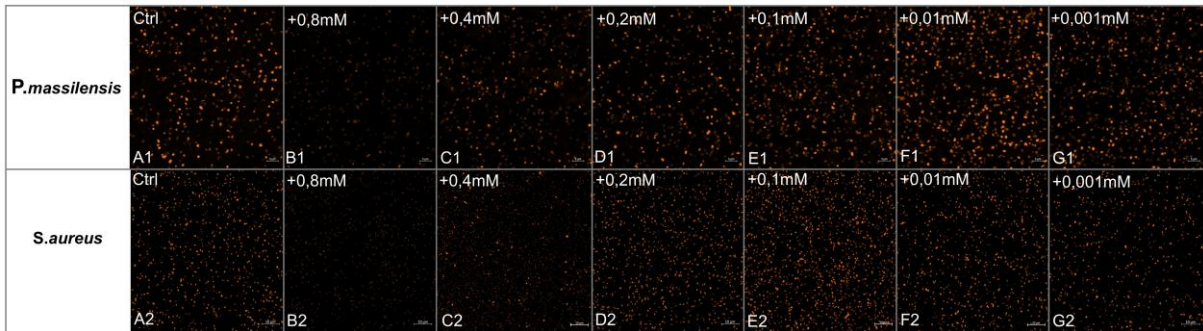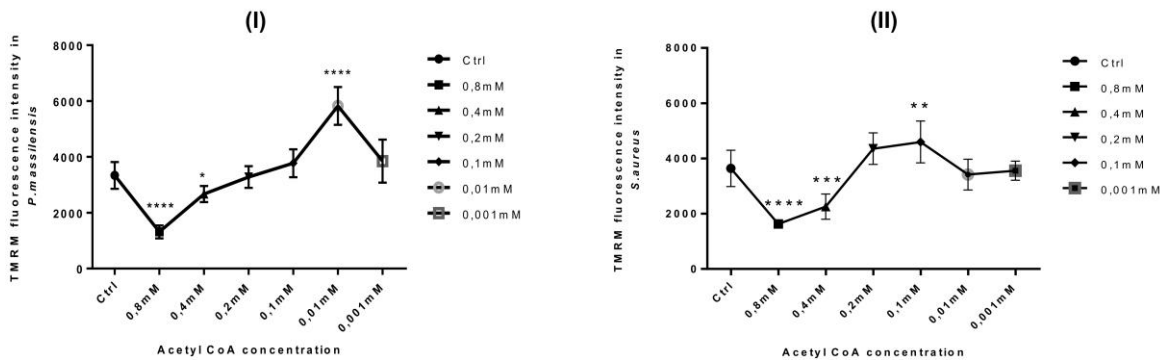

545

546

547 **Figure 8: Schematic representation of the TCA cycle showing the predicted ORFs of *P.***  
 548 ***massiliensis* with similarities to TCA cycle enzymes, and a summary of the results**  
 549 **provided by qRT-PCR, RNA sequencing and proteomics.**

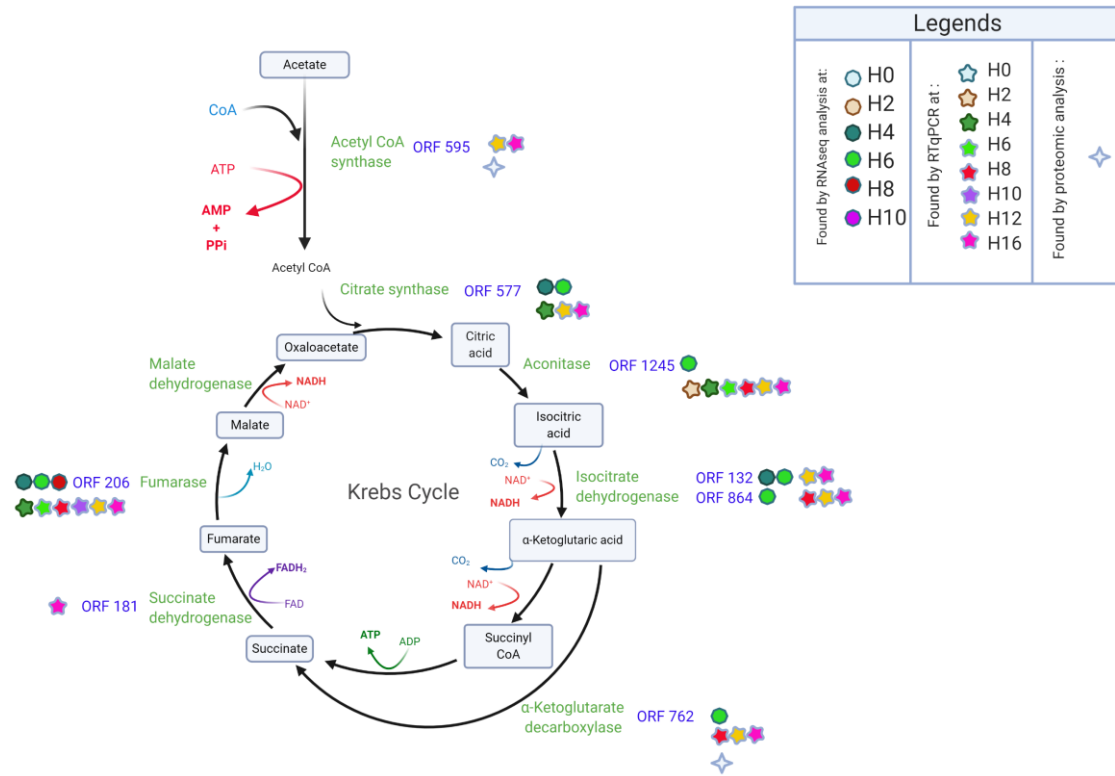

550

551

552 **Figure 9: Evaluation of the enzymatic IDH activity of *P. massiliensis* ORF132.**

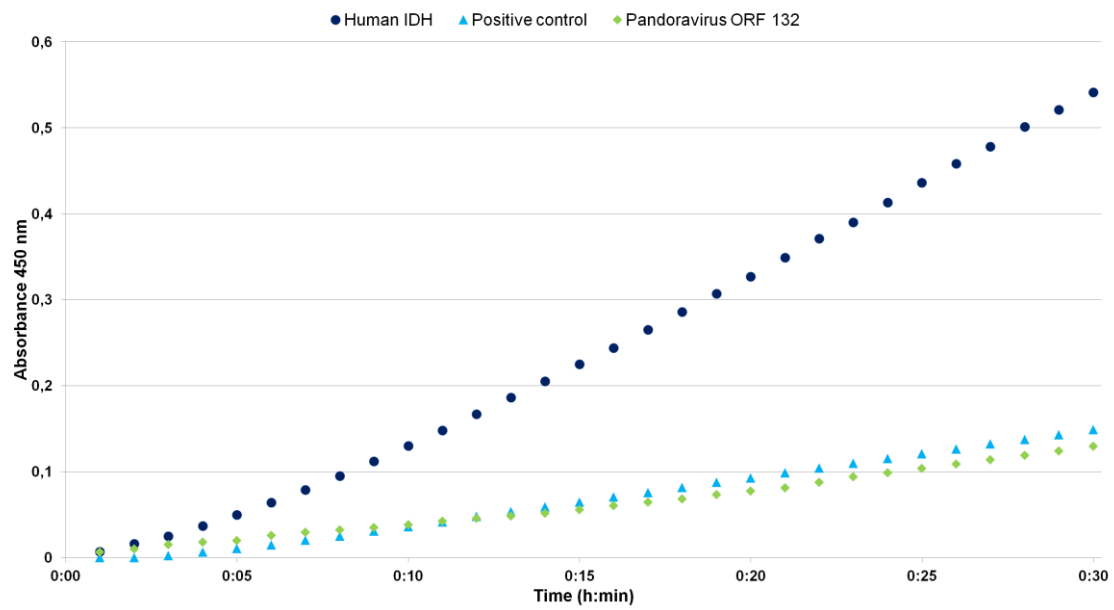

553

554

555

556  
557  
558  
559  
560  
561  
562  
563  
564  
565  
566  
567  
568  
569  
570  
571  
572  
573  
574  
575  
576  
577  
578  
579  
580  
581  
582  
583  
584  
585  
586  
587  
588  
589  
590

## REFERENCES

1. La Scola, B., Audic, S., Robert, C., Jungang, L., de, L., X, Drancourt, M., Birtles, R., Claverie, J. M., & Raoult, D. (2003) *Science* **299**, 2033.
2. Rolland, C., Andreani, J., Louazani, A. C., Aherfi, S., Francis, R., Rodrigues, R., Silva, L. S., Sahmi, D., Mougari, S., Chelkha, N. *et al.* (2019) *Viruses*. **11**.
3. Raoult, D., Audic, S., Robert, C., Abergel, C., Renesto, P., Ogata, H., La Scola, B., Suzan, M., & Claverie, J. M. (2004) *Science* **306**, 1344-1350.
4. Philippe, N., Legendre, M., Doutre, G., Coute, Y., Poirot, O., Lescot, M., Arslan, D., Seltzer, V., Bertaux, L., Bruley, C. *et al.* (2013) *Science* **341**, 281-286.
5. Brahim, B. D., Baudoin, J. P., Gnankou, F., Di, P. F., Colson, P., Aherfi, S., & La, S. B. (2019) *Front Microbiol.* **10**, 2932.
6. La Scola, B., Desnues, C., Pagnier, I., Robert, C., Barrassi, L., Fournous, G., Merchat, M., Suzan-Monti, M., Forterre, P., Koonin, E. *et al.* (2008) *Nature* **455**, 100-104.
7. Levasseur, A., Bekliz, M., Chabriere, E., Pontarotti, P., La, S. B., & Raoult, D. (2016) *Nature* **531**, 249-252.
8. Bekliz, M., Azza, S., Seligmann, H., Decloquement, P., Raoult, D., & La, S. B. (2018) *J. Virol.* **92**.
9. Abrahao, J., Silva, L., Silva, L. S., Khalil, J. Y. B., Rodrigues, R., Arantes, T., Assis, F., Boratto, P., Andrade, M., Kroon, E. G. *et al.* (2018) *Nat. Commun.* **9**, 749.
10. Schulz, F., Yutin, N., Ivanova, N. N., Ortega, D. R., Lee, T. K., Vierheilig, J., Daims, H., Horn, M., Wagner, M., Jensen, G. J. *et al.* (2017) *Science* **356**, 82-85.
11. Lamb, D. C., Lei, L., Warrilow, A. G., Lepesheva, G. I., Mullins, J. G., Waterman, M. R., & Kelly, S. L. (2009) *J. Virol.* **83**, 8266-8269.
12. Lamb, D. C., Follmer, A. H., Goldstone, J. V., Nelson, D. R., Warrilow, A. G., Price, C. L., True, M. Y., Kelly, S. L., Poulos, T. L., & Stegeman, J. J. (2019) *Proc. Natl. Acad. Sci. U. S. A* **116**, 12343-12352.
13. Rodrigues, R. A. L., Arantes, T. S., Oliveira, G. P., Dos Santos Silva, L. K., & Abrahao, J. S. (2019) *Adv. Virus Res.* **103**, 135-166.
14. Vardi, A., Haramaty, L., Van Mooy, B. A., Fredricks, H. F., Kimmance, S. A., Larsen, A., & Bidle, K. D. (2012) *Proc. Natl. Acad. Sci. U. S. A* **109**, 19327-19332.
15. Aherfi, S., Andreani, J., Baptiste, E., Oumessoum, A., Dornas, F. P., Andrade, A. C. D. S., Chabriere, E., Abrahao, J., Levasseur, A., Raoult, D. *et al.* (2018) *Front Microbiol.* **9**, 1486.
16. La, S. B., Rydkina, L., Ndiokubwayo, J. B., Vene, S., & Raoult, D. (2000) *Clin. Diagn. Lab Immunol.* **7**, 612-616.

- 591 17. Andreani, J., Arnault, J. P., Bou Khalil, J. Y., Abrahao, J., Tomei, E., Vial, E., Le, B. M., Raoult, D.,  
592 & La, S. B. (2019) *Emerg. Infect. Dis.* **25**, 212-219.
- 593 18. Reed LJ & Muench H (1938).
- 594 19. Marchler-Bauer, A., Lu, S., Anderson, J. B., Chitsaz, F., Derbyshire, M. K., DeWeese-Scott, C.,  
595 Fong, J. H., Geer, L. Y., Geer, R. C., Gonzales, N. R. *et al.* (2011) *Nucleic Acids Res.* **39**, D225-  
596 D229.
- 597 20. Marchler-Bauer, A., Bo, Y., Han, L., He, J., Lanczycki, C. J., Lu, S., Chitsaz, F., Derbyshire, M. K.,  
598 Geer, R. C., Gonzales, N. R. *et al.* (2017) *Nucleic Acids Res.* **45**, D200-D203.
- 599 21. Zimmermann, L., Stephens, A., Nam, S. Z., Rau, D., Kubler, J., Lozajic, M., Gabler, F., Soding, J.,  
600 Lupas, A. N., & Alva, V. (2018) *J. Mol. Biol.* **430**, 2237-2243.
- 601 22. Kelley, L. A., Mezulis, S., Yates, C. M., Wass, M. N., & Sternberg, M. J. (2015) *Nat. Protoc.* **10**,  
602 845-858.
- 603 23. Lechner, M., Findeiss, S., Steiner, L., Marz, M., Stadler, P. F., & Prohaska, S. J. (2011) *BMC.*  
604 *Bioinformatics.* **12:124**. doi: [10.1186/1471-2105-12-124](https://doi.org/10.1186/1471-2105-12-124), 124-12.
- 605 24. Tatusov, R. L., Galperin, M. Y., Natale, D. A., & Koonin, E. V. (2000) *Nucleic Acids Res.* **28**, 33-  
606 36.
- 607 25. Tatusov, R. L., Fedorova, N. D., Jackson, J. D., Jacobs, A. R., Kiryutin, B., Koonin, E. V., Krylov,  
608 D. M., Mazumder, R., Mekhedov, S. L., Nikolskaya, A. N. *et al.* (2003) *BMC. Bioinformatics.* **4**,  
609 41.
- 610 26. Koressaar, T. & Remm, M. (2007) *Bioinformatics.* **23**, 1289-1291.
- 611 27. Reteno, D. G., Benamar, S., Khalil, J. B., Andreani, J., Armstrong, N., Klose, T., Rossmann, M.,  
612 Colson, P., Raoult, D., & La, S. B. (2015) *J. Virol.* **89**, 6585-6594.
- 613 28. Zorova, L. D., Popkov, V. A., Plotnikov, E. Y., Silachev, D. N., Pevzner, I. B., Jankauskas, S. S.,  
614 Babenko, V. A., Zorov, S. D., Balakireva, A. V., Juhaszova, M. *et al.* (2018) *Anal. Biochem.* **552**,  
615 50-59.
- 616 29. Garrett, R. H. & Grisham C.M. (2012) *Biochemistry.*
- 617 30. Maeting, I., Schmidt, G., Sahm, H., & Stahmann, K. P. (2000) (Science Direct, pp. 335-343.
- 618 31. Fedoy, A. E., Yang, N., Martinez, A., Leiros, H. K., & Steen, I. H. (2007) *J. Mol. Biol.* **372**, 130-  
619 149.
- 620 32. Steen, I. H., Lien, T., & Birkeland, N. K. (1997) *Arch. Microbiol.* **168**, 412-420.
- 621 33. Berg, J. M., Tymoczko, J. L., & Stryer, L. (2002) (W H Freeman, New York).
- 622 34. Krebs, H. A. & Johnson, W. A. (1937) *Biochem. J.* **31**, 772-779.
- 623 35. Muller, M. (1988) *Annu. Rev. Microbiol.* **42**, 465-488.
- 624 36. Muller, M. (1993) *J. Gen. Microbiol.* **139**, 2879-2889.



- 625 37. Tielens, A. G. & Van Hellemond, J. J. (1998) *Biochim. Biophys. Acta* **1365**, 71-78.
- 626 38. Hedderich, R., Klimmek, O., Kröger, A., Dirmeier, R., Keller, M., & Stetter, K. O. (1998)  
627 *Anaerobic respiration with elemental sulfur and with disulfides*.
- 628 39. Monier, A., Chambouvet, A., Milner, D. S., Attah, V., Terrado, R., Lovejoy, C., Moreau, H.,  
629 Santoro, A. E., Derelle, E., & Richards, T. A. (2017) *Proc. Natl. Acad. Sci. U. S. A* **114**, E7489-  
630 E7498.
- 631 40. Schvarcz, C. R. & Steward, G. F. (2018) *Virology* **518**, 423-433.
- 632 41. Moniruzzaman, M., Martinez-Gutierrez, C. A., Weinheimer, A. R., & Aylward, F. O. (2020) *Nat.*  
633 *Commun.* **11**, 1710.  
634  
635

636

## TABLES

637 **Table 1. qRT-PCR primers used in the present study of the predicted ORFs of *P.***  
638 *massiliensis*.

| Predicted ORF  | Predicted function                    | Sequences of the primers (5'-3')                     |
|----------------|---------------------------------------|------------------------------------------------------|
| <b>ORF595</b>  | Acetyl Co A Synthetase                | F: CCCACCAAGCAATCTCTGTGTC<br>R: TACTGTGTGTGTGGGTAGGC |
| <b>ORF577</b>  | Citrate synthase                      | F: TCTGGATGGCGTACGGAG<br>R: CGACTTTTCCTCGCCATCTG     |
| <b>ORF1245</b> | Aconitate hydratase                   | F: TAGGATAGGGCGTCGGATTC<br>R: GAACAAGAAGGCACCAAGGG   |
| <b>ORF132</b>  | Isocitrate dehydrogenase              | F: ATCCTGATCCATCCATGCGT<br>R: CGTCCCAGCACAAAGAGTTTT  |
| <b>ORF864</b>  | Isocitrate dehydrogenase              | F: TGTGTGTCGGCACTTTCCAAG<br>R: CTTTTCCGTGAGCAGGTGAG  |
| <b>ORF762</b>  | $\alpha$ -ketoglutarate decarboxylase | F: TGTCTGTTTCTTGCCGAGTC<br>R: TTTCTTGGGCGCTTTCAGAG   |
| <b>ORF181</b>  | Succinate dehydrogenase               | F: CAGTGGCCGATATTGTGCAA<br>R: GTCGATGGCAGCTACAAGAC   |
| <b>ORF206</b>  | Fumarase                              | F: TTGGGAGGAGTTGGTCTGTG<br>R: CGCTTGAGTTGTCCGTGTT    |

639

640

641

642

643

644

645

646

647

648 **Table 2: Results of the DELTA-Blast analyses carried out on the pandoraviruses**

| Virus                  | Protein            | Genbank accession num. of the hit | Predicted function                                                | e-value  | % identity | Number of identical residues |
|------------------------|--------------------|-----------------------------------|-------------------------------------------------------------------|----------|------------|------------------------------|
| <i>P. inopinatum</i>   | YP_009119080.1     | GBF28309.1                        | Acetyl-coenzyme A synthetase                                      | 0,003    | 42         | 21                           |
| <i>P. pampulha</i>     | Orf 1608           | RPB15391.1                        | Citrate synthase                                                  | 1,56e-04 | 29         | 29                           |
| <i>P. celtis</i>       | QBZ81646.1         | WP_007415625.1                    | Citrate synthase                                                  | 6,35e-04 | 32         | 21                           |
| <i>P. braziliensis</i> | Scaffold 1 orf 726 | WP_038537937.1                    | Aconitate hydratase AcnA                                          | 5,53e-05 | 36         | 18                           |
| <i>P. neocaledonia</i> | YP_009481720.1     | WP_016709093.1                    | Bifunctional aconitate hydratase 2/2-methylisocitrate dehydratase | 0,002    | 36         | 24                           |
| <i>P. dulcis</i>       | YP_008318963.1     | WP_085890007.1                    | NADP-dependent isocitrate dehydrogenase                           | 0,009    | 48         | 10                           |
| <i>P. dulcis</i>       | YP_008320016.2     | HAU16652.1                        | Succinate dehydrogenase flavoprotein subunit                      | 2,76e-04 | 36         | 19                           |
| <i>P. braziliensis</i> | Scaffold 2 orf 14  | WP_010797804.1                    | Succinate dehydrogenase                                           | 4,69e-06 | 58         | 21                           |
| <i>P. salinus</i>      | YP_008436514.1     | KAB2653497.1                      | Fumarate reductase/succinate dehydrogenase flavoprotein subunit   | 7,57e-04 | 48         | 15                           |
| <i>P. salinus</i>      | YP_008437242.1     | WP_162476042.1                    | Succinate dehydrogenase iron-sulfur subunit                       | 0,001    | 34         | 21                           |
| <i>P. dulcis</i>       | YP_008319894.1     | WP_085081987.1                    | Fumarate reductase/succinate dehydrogenase flavoprotein subunit   | 0,002    | 43         | 13                           |
| <i>P. salinus</i>      | YP_008438520.1     | CDJ81749.1                        | Lactate malate dehydrogenase domain containing protein            | 6,31e-05 | 32         | 19                           |

649

650

651 **Table 3: Detection of *P. massiliensis* predicted TCA ORFs by qRT-PCR at different time**  
 652 **points.**

| ORFs    | Predicted Enzyme                      | H0 | H2 | H4 | H6 | H8 | H10 | H12 | H16 |
|---------|---------------------------------------|----|----|----|----|----|-----|-----|-----|
| ORF595  | Acetyl CoA synthetase                 | NA | NA | NA | NA | 37 | NA  | 31  | 30  |
| ORF577  | Citrate synthetase                    | NA | 35 | 34 | 36 | 38 | NA  | 30  | 28  |
| ORF1245 | Aconitase                             | NA | 34 | 31 | 30 | 34 | NA  | 25  | 27  |
| ORF132  | Isocitrate dehydrogenase              | NA | NA | 38 | 38 | 38 | NA  | 24  | 25  |
| ORF864  | Isocitrate dehydrogenase              | NA | NA | 37 | 35 | 31 | NA  | 32  | 30  |
| ORF762  | $\alpha$ -ketoglutarate decarboxylase | NA | NA | NA | 36 | 27 | NA  | 22  | 23  |
| ORF181  | Succinate dehydrogenase               | NA | NA | NA | NA | NA | NA  | NA  | 28  |
| ORF206  | Fumarase                              | NA | NA | 31 | 29 | 27 | 31  | 25  | 25  |

653

654 Footnotes: The numbers in each case are the Ct obtained for qPCR. NA: No amplification.

655

656
